1  
2  
3  
4  
5  
6  
7  
8  
9  
10  
11  
12  
13  
14  
15  
16  
17  
18  
19  
20  
21  
22  
23  
24  
25  
26  
27  
28  
29  
30

Article

## Evolutionary patterns of the chimerical retrogenes in *Oryza*

Yanli Zhou<sup>1,3</sup>, Huazhi Song<sup>1</sup>, Jinghua Xiao<sup>1</sup>, Qifa Zhang<sup>1</sup> and Manyuan Long<sup>2</sup>, Chengjun Zhang<sup>1,3#</sup>

<sup>1</sup>National Key Laboratory of Crop Genetic Improvement, Huazhong Agricultural University, Wuhan, 430070, China

<sup>2</sup>Department of Ecology and Evolution, The University of Chicago, Chicago, IL 60637, USA

<sup>3</sup>Germplasm Bank of Wild species, Kunming Institute of Botany, Chinese Academy of Sciences. No. 132, Lanhei Road, Kunming 650201, Yunnan, China

Correspondence to: Chengjun Zhang; email: zhangchengjun@mail.kib.ac.cn

31

32 **Abstract**

33 Chimerical retroposition delineate a process by which RNA reverse transcribed integration into  
34 genome accompanied with recruiting flanking sequence, which is asserted to play essential roles  
35 and drive genome evolution. Although chimerical retrogenes hold high origination rate in plant  
36 genome, the evolutionary pattern of retrogenes and their parental genes are not well understood in  
37 rice genome. In this study, using maximum likelihood method, we evaluated the substitution ratio  
38 along lineages of 24 retrogenes and parental gene pairs to retrospect the evolutionary patterns. The  
39 results indicate that some specific lineages in 7 pairs underwent positive selection. Besides the rapid  
40 evolution in the initial stage of new chimerical retrogene evolution, an unexpected pattern was  
41 revealed: soon or some uncertain period after the origination of new chimerical retrogenes, their  
42 parental genes evolved rapidly under positive selection, rather than the rapid evolution of the new  
43 chimerical retrogenes themselves. This result lend support to the hypothesis that the new copy  
44 assistant the function evolution among parental gene and retrogene. Transcriptionally, we also  
45 found that one retrogene (RCG3) have a high expression at the period of calli infection which  
46 supported by chip data while its parental gene doesn't have. Finally, by calibration to Ka/Ks  
47 analysis results in other species including *Apis mellifera*, we concluded that chimerical retrogenes  
48 are higher proportionally positive selected than the regular genes in the rice genome.

49

50 **Key words:** evolutionary pattern, positive selection, rapid evolution, chimerical retrogene

51

52

## 53 **Introduction**

54 Retroposed duplicate genes, retrogenes, result from the process of retrotransposition, in which  
55 mRNAs are reverse-transcribed into cDNA and then inserted into a new genomic position (Zhang,  
56 Wu, et al. 2005). Because of the processed nature of mRNAs, the newly duplicated paralogs lack  
57 introns, have a poly-A tail and short flanking repeats, causing function inefficiency of retrogenes for  
58 the lack of regulation element. However, chimerical retrogenes resurrect gene integrity by  
59 recruiting genome resided flanking sequence, is tenable to confer new functions and thus contribute  
60 to adaptive evolution.

61 The gene *Jingwei*, which originated by the insertion of a retrocopy of the Alcohol dehydrogenase  
62 gene (*Adh*) into the *yande* in *Drosophila*, was the first characterized young chimerical gene (Long  
63 and Langley 1993). Since then, many new retrogenes with chimerical structures have been reported  
64 in animals. The *Sdic* gene fused from *Cdic* and *AnnX* (Nurminsky, et al. 1998), non-protein-coding  
65 RNA gene *sphinx* (Wang, et al. 2002), retroposed fission gene family monkey king (Wang, et al.  
66 2004) and *siren* gene derived from *Adh* (Nozawa, et al. 2005). Recently, 14 chimerical genes were  
67 identified in *Drosophila* (Rogers, et al. 2009) and one of them named *Qtzl* was observed to have  
68 male-reproductive function (Rogers, et al. 2010). It was also reported that approximately twenty  
69 retrogenes in primates and mammals (Kaessmann, et al. 2009). For example, TRIM5-CypA fusion  
70 protein (*TRIMCyp*) gene is formed by a cyclophilin A (*CypA*) cDNA transposed into the *TRIM5*  
71 locus (Virgen, et al. 2008; Wilson, et al. 2008); Marques worked out that approximately 57  
72 retrogenes in the human genome emerged in primates (Marques, et al. 2005). Despite these plentiful  
73 findings of retrogenes in animals, however, no retrogenes have been systematically identified in  
74 plant until the retroposons excavation in *Arabidopsis* (Zhang, Wu, et al. 2005). Soon later,  
75 chimerical retrogenes were creative mentioned in rice (Wang, et al. 2006). In rice genome, the  
76 abundant retroposition mediated chromosomal rearrangements resulted in 898 presumed retrogenes,  
77 380 of which were found to create chimerical gene structures, by recruiting nearby exon-intron  
78 sequences. Many of these chimerical retrogenes originated recently, while how did they shape their  
79 fortunes are poorly understood.

80 Since the searching of new retrogenes becomes technically easier, more opportunities are available  
81 to further investigate the evolutionary patterns of chimerical retrogenes. Parallel changes in the

82 spatial and physicochemical properties of functionally important protein regions, have been  
83 reported in the evolution of young chimerical retrogenes (Zhang, et al. 2004). Three retrogenes in  
84 *Drosophila*, i.e., *Jinwei*, *Adh-Finnegan* and *Adh-Twain*, were found to undergo rapid adaptive  
85 amino acid evolution in a short period of time after they were formed, then followed by later  
86 quiescence and functional constraint (Jones and Begun 2005; Jones, et al. 2005). The finding of the  
87 initially-elevated and subsequent slowdown substitution pattern concluded the first insight into the  
88 adaptive evolutionary process of the new genes.

89 Although the rice genomes have a high rate to generate chimerical retrogenes, the patterns of  
90 sequence evolution and underlying mechanisms to prompt these new retrogenes are unclear. To  
91 understand these two critical aspects of new gene evolution, we analyzed 24 retrogenes by choosing  
92 randomly from 380 chimerical retrogenes suggested in previous research (Wang, et al. 2006), this  
93 rich dataset of retrogenes and their rapid origination provided an opportunity to investigate and  
94 understand the evolutionary patterns of the retrogene pairs in rice, and to check whether the  
95 chimerical gene undergoes rapid positive selection subsequent from retrogene formed.

## 96 **Materials and Methods**

### 97 **Samples, Primers and Molecular Cloning**

98 There are ten species and two subspecies included in our study, the seven species, *Oryza*  
99 *grandiglumis* (use *Grandi* for short), *Oryza longistaminata* (*Longi*), *Oryza alta* (*Alta*), *Oryza*  
100 *australiensis* (*Austra*), *Oryza rufipogon* (*Rufi*), *Oryza nivara* (*Nivara a* and *Nivara b*), *Oryza*  
101 *glaberrima* (*Glab*), get from International Rice Research Institute (IRGC), the IRGC ACC ID is  
102 shown in Table S1. The other two species *O. punctate* (*YSD8*) and *O. officinalis* (*OWR*) were from  
103 Wang's lab. And the two subspecies *Oryza sativa* ssp. *Indica* (*Indica*) and *Oryza sativa* ssp.  
104 *japonica* (*Japonica*) were used as reference genomes for that whose whole genome have been  
105 completely sequenced and treated as gold standard. Total genomic DNA was isolated from leaf  
106 using the Cetyl Trimethyl Ammonium Bromide (CTAB) method. The *YSD8* (BB genome) and  
107 *OWR* (CC genome) genomic DNA were obtained from Wang's lab.

108 All primers were designed according to genome sequences of *Japonica* and *Indica* in Table S2 (the  
109 other 17 pairs are not shown). Since the extremely redundant sequences around the chimerical  
110 retrogenes region, the primers were annealing to flanked sequence with approximate 1 kb length of  
111 PCR products. After amplified by polymerase chain reaction (PCR), the product DNA was

112 sequenced with single-end from the 5'ends methods on an ABI Prism 3730 sequencer. All the  
113 sequence used in our study were derived from PCR sequencing unless PCR did not success in  
114 reference species but succeed in other sibling species. For this instance, substitution of 9311  
115 genomic sequence was used for Indica in later analysis.

#### 116 **Sequencing region detail**

117 In previous study (Wang, et al. 2006), 898 intact retrogenes were found in *Indica* (9311) by *in-silico*  
118 way, and they indicated that 380 retrogenes have chimerical structures. We chose 24 retrogenes  
119 randomly from the 380 retrogenes, and positive selection acted on some specific branch (the  
120 analysis is show in the latter chapter) of seven retrogenes. The seven retrogenes are *RCG1*  
121 (Retro-Chimerical Gene1, chimerical id Chr03\_4107, chimerical id is identical with the data in  
122 2006 paper), *RCG2* (Chr04\_4524), *RCG3* (Chr12\_934), *RCG4* (Chr10\_2602), *RCG5* (Chr01\_5436),  
123 *RCG6* (Chr02\_1920), *RCG7* (Chr08\_3454). To exclude the artefacts of genome sequencing and  
124 assembly in 9311, we searched these seven chimerical retrogene and parental gene against newly  
125 PacBio genome IR8 (Table S3). According to the previous study and public database (Gramene), all  
126 these seven genes didn't find homologous structure in maize and sorghum. The chimerical structure  
127 of three retrogenes are demonstrated in Fig. S3.

#### 128 **Sequence edit and blast analysis**

129 Using the designed primers, we cloned the sequences from the wild rice genomic DNA. The  
130 sequences got from the PCR were shown in Table S4. In the computational evolutionary analysis,  
131 the sequences cloned by PCR which is not long enough or can't alignment to the retrogene is  
132 eliminated. In *RCG4* and *RCG7*, the *Indica* sequence from PCR (*Indica* in Fig. 1) share high  
133 similarity with reference genome (*Indica\_genome* in Fig. 1), and we cannot confirm which one is  
134 orthologous to other species, so both PCR sequences and genomic sequences are used in the  
135 calculation for this study.

#### 136 **Molecular evolution analysis**

##### 137 Phylogenetic Reconstruction

138 The sequences of retrogene pairs of coding regions were first translated to amino acid using the  
139 chimerical retrogene structure according to reference sequences, after the alignment by MEGA7  
140 (Tamura, et al. 2007) with ClustalW, the amino acid sequences were retranslated into nucleotide.  
141 The amino acid alignments of seven positive selection candidate retrogene pairs were shown in Fig.

142 1, the other seventeen are shown in Fig. S1. The phylogenies used in analysis are built by MEGA7  
143 using NJ method with the default parameter. All seven phylogenies were shown in Fig. 2, the other  
144 seventeen were shown in Fig. S2.

145 Maximum likelihood analysis for estimating the parameters

146 We employed the OBSM (Optimal Branch Specific Model) program (Zhang, et al. 2011) to explore  
147 the most probable branch-specific model to estimate its non-synonymous substitution per  
148 non-synonymous site ( $K_a$ ) and synonymous substitution per synonymous site ( $K_s$ ) respectively and  
149 the corresponding omega ( $\omega = K_a/K_s$ ) ratio. Here,  $\omega$  is well accepted in evolutionary interpretation  
150 that when  $\omega > 1$ , suggesting positive selection; when  $\omega \approx 1$ , suggesting neutral evolution while  $\omega < 1$   
151 suggest purify selection with functional constraint. OBSM has three methods, the first method cost  
152 less time while the third method is more time-consuming but gets a better result, which means that  
153 have a better branch-specific model in likelihood ratio test (LRT) (Zhang, et al. 2011) or Akaike  
154 Information Criterion (AIC) comparison (Akaike 1974).

155 We calculated all these 24 retrogene sets by three methods of OBSM. In analysis, we removed all  
156 gaps in alignments, set the codon frequency of the CODEML control file at CodonFreq = 3, set the  
157 parameter k in method III of OBSM at 0.5. Furthermore, we employed the branch-site model (Yang  
158 and Nielsen 2002) to explore the positive sites, and fix the specific branch suggested by the final  
159 optimal models as foreground branch. The suggested test 1 and the suggested test 2 were employed  
160 to detect positive selection sites (Zhang, Nielsen, et al. 2005).

## 161 **Results**

### 162 **Seven retrogene pairs undergo positive selection**

163 According to the results of calculation by three methods, we obtain seven among twenty-four  
164 retrogene pairs were undergoing positive selection. All the log likelihood (lnL) values and  
165 parameter of final optimal models for seven retrogene pairs for each method are shown in Table 1;  
166 other seventeen retrogenes are shown in Table S5, which laid foundations for the selective site  
167 analysis in Table 2. All these analyses are described in detail as follows.

#### 168 *RCGI*

169 *RCGI* is a new gene that originated 3.15 MYA ( $K_s \approx 0.041$ ) in the rice genome. The log likelihood  
170 (lnL) value of the optimal model of method III is -996.78, is significantly better than the lnL value  
171 of the optimal model of the method I and method II (LRT: df = 1  $2\Delta L = 5.17$  p-value = 0.023). This

172 result indicates that method III more suitable for *RCG1* data. The estimating of Ka/Ks ratio of  
173 lineage branch 9 in the final optimal model of the method I and method II were infinite (999), and  
174 the Ka/Ks ratio of branch 9, 8, 11 and 5 in the final optimal model of method III is infinite (999).  
175 All these models indicate that the evolution pattern of *RCG1* retrogene pair is episodic. Although it  
176 failed in likelihood ratio test (LRT:  $df = 1$ ,  $2\Delta L = 3.006$ ,  $p\text{-value} = 0.083$ ) when we nested a  
177 comparison between the final optimal model and fix-model which fixed the Ka/Ks ratio of branch 9,  
178 8, 11 and 5 to one, the estimates of parameters in this optimal model suggest that there're sixteen  
179 non-synonymous substitutions versus zero synonymous substitution occurred along the lineage 8, it  
180 has a great possibility that the lineage 8 is undergoing positive selection that the previous study  
181 suggest positive selection when the non-synonymous substitutions greater than 9 while the  
182 synonymous substitution is equal to 0 (Nozawa et al. 2009). Based on the final optimal model of  
183 method III, we used the branch-site model to identify the positive sites. In test 1, M1a ( $\ln L = -995.55$ )  
184 versus Model A ( $\ln L = -989.46$ ),  $2\Delta L = 12.17$ ,  $p\text{-value} = 0.0023$  ( $df = 2$ ); in test 2, Model A versus  
185 fix-Model A ( $\ln L = -993.85$ ),  $2\Delta L = 8.77$ ,  $p\text{-value} = 0.0031$  ( $df = 1$ ). All these two tests indicate that the  
186 Model A fit the data better than others, Model A suggests five sites to be potentially under positive  
187 selection along the foreground branch at the 95% level according to the BEB analysis, these sites  
188 are 1S, 43D, 130P, 138A, 152L, the parameters estimate by Model A are  $p_0 = 0.645$ ,  $p_1 = 0.153$ ,  $p_2 =$   
189  $0.163$ ,  $p_3 = 0.039$ ,  $\omega_0 = 0.009$ ,  $\omega_2 = 999$ .

## 190 *RCG2*

191 *RCG2* is a new gene that originated 6.92 MYA ( $K_s \approx 0.090$ ) in the rice genome. The OBSM methods  
192 suggest that, excepting lineage 4 in final optimal model of the method I and method II, lineage 4  
193 *Nivara* a and b\_P and lineage 1 *Indica-Japonica* P&C in final optimal model of the method III, the  
194 Ka/Ks ratio is less than 1 (0.358, 0.321 respectively), all other lineages are greater than 1 (1.744,  
195 1.835 respectively). The log likelihood ( $\ln L$ ) values of these two models are -1381.52 and -1380.48,  
196 respectively. Since they have the same  $\omega$  ratio numbers, the latter model is considered being better  
197 because of lower  $\ln L$  value. The *RCG2* retrogene pair were undergoing positive selection is  
198 confirmed when we nested a comparison between the fix-model and corresponding final optimal  
199 models, the  $2\Delta L$  is 6.474, the  $p\text{-value}$  is 0.011. The final optimal model indicates that the positive  
200 selection permeates the whole evolution pattern of *RCG2* retrogene pair. The estimates of  
201 parameters in the final optimal models suggest that the non-synonymous substitutions in five

202 lineages 3, 7, 5, 6 and 2 are all greater than 9, rang from 10.5 to 26.3.

203 Model A more suitable than others based on the final optimal model, two branch-sites model tests.

204 Nine sites to be potentially under positive selection along the foreground branch at the 95% level

205 according to the BEB analysis (19S, 29L, 56E, 67G, 68D, 71S, 73I, 74F, 88S, 97G, 127K, 158R,

206 160Y, 163D). The parameters suggested by Model A are  $p_0= 0.364$ ,  $p_1= 0.123$ ,  $p_2= 0.384$ ,  $p_3=$

207  $0.129$ ,  $\omega_0= 0$ ,  $\omega_2= 3.485$ .

208 *RCG3*

209 *RCG3* is homologous to a *Verticillium wilt* resistance gene *Ve1* (Kawchuk, et al. 2001; Fradin, et al.

210 2009) which originated 14.77 MYA ( $K_s \approx 0.192$ ) in the rice genome. The lnL value of final optimal

211 model of the method I and method II is -2105.91, the lnL value of the final optimal model of

212 method III is -2104.41, since they have the same  $\omega$  ratio numbers, the latter model is considered

213 being better. The estimate of Ka/Ks ratio of lineage *Nivara b\_P* in final optimal model of the

214 method I and method II is 1.388, the estimate of Ka/Ks ratio of branch 15, 6 and 10 in the final

215 optimal model of method III is 1.524. Although all these two models not significant in LRTs tests

216 when we nested a comparison between the fix-model and final optimal model, it is suggested that

217 the branch 8 have a much higher substitution rate than the background substitution rate since the

218 large non-synonymous substitutions in it (30.3 and 31.0 respectively).

219 Based on the final optimal model, two branch-sites model tests based on the final optimal models

220 indicate that the Model A fit the data better than others. Model A suggests ten sites to be potentially

221 under positive selection along the foreground branch at the 95% level according to the BEB

222 analysis, these sites are 210G, 211K, 215L, 216N, 218T, 220L, 221E, 228N, 229N, 230F.

223 Surprisingly, all these sites are very close to each other and seem to be a functional domain. The

224 parameters suggested by Model A are  $p_0= 0.461$ ,  $p_1= 0.467$ ,  $p_2= 0.036$ ,  $p_3= 0.036$ ,  $\omega_0= 0$ ,  $\omega_2=$

225  $669.88$ .

226 *RCG4*

227 Given the complexity of these sixteen sequences included in this retrogene pair, the result of the

228 most probable estimating models suggested by OBSM are different totally. The final optimal model

229 suggested by Method I is a seven-ratio model and the lnL value is -2595.79. The final optimal

230 model suggested by Method II is a six-ratio model and the lnL value is -2587.67. The final optimal

231 model suggested by Method III is a three-ratio model and the lnL value is -2586.49. Obviously, the



232 final optimal model of Method III fit the data better than other two models since the fewer  
233 parameters and the larger lnL value. Although this model failed in LRTs when we nested a  
234 comparison between the fix-model and final optimal model, it is suggested by all three final optimal  
235 models that the lineage *Nivara* b\_P have a much higher substitution rate than the background  
236 substitution rate. The estimates of parameters in these three optimal models suggest that the  
237 non-synonymous substitutions in lineage *Nivara* b\_P are 18.7, 18.7 and 16.5 respectively.

238 Based on the final optimal model of method III, two tests indicate that the Model A fit the data  
239 better than other models. Model A suggests two sites to be potentially under positive selection along  
240 the foreground branch at the 95% level according to the BEB analysis; these sites are 51Y, 75R. The  
241 parameters suggested by Model A are  $p_0=0.602$ ,  $p_1=0.290$ ,  $p_2=0.073$ ,  $p_3=0.035$ ,  $\omega_0=0.121$ ,  $\omega_2=$   
242 16.92.

243 *RCG5*

244 The lnL value of the final optimal model of Method I and Method II is -1523.01, the lnL value of  
245 final optimal model of Method III is -1520.80, the latter one is significantly better than the former  
246 one according to the LRTs ( $df=1$ ,  $2\Delta L=4.404$ ,  $p\text{-value}=0.036$ ). This result indicates that the final  
247 optimal model of method III fit *RCG5* gene pair better than the former model. The estimating of  
248 Ka/Ks ratio of lineage Glab\_P in final optimal model of method I and method II is 2.20, and the  
249 estimating of Ka/Ks ratio of lineage Glab\_P, branch 10, and lineage *Nivara* a in the final optimal  
250 model of method III is 2.66. All these models indicate that the evolution pattern of *RCG5* retrogene  
251 pair is episodic. Although it is failed in LRTs ( $df=1$ ,  $2\Delta L=2.612$ ,  $p\text{-value}=0.106$ ) when we nested a  
252 comparison between the final optimal model and fix-model which fixed the Ka/Ks ratio of lineages  
253 Glab\_P, branch 10 and *Nivara*-a equals to one. The estimates of parameters in final optimal model  
254 of method III suggest that they're about 10.8 non-synonymous substitutions along the branch 10,  
255 and there're 16.6 non-synonymous substitutions along the lineage Glab\_P, it has a great possibility  
256 that the branch 10 and Glab\_P are undergoing positive selection.

257 Based on the final optimal model of method III, we used branch-site model to identify the positive  
258 sites. In test 1, M1a (lnL=-995.55) versus Model A (lnL=-989.46),  $2\Delta l=12.172$ ,  $p\text{-value}=0.0023$   
259 ( $df=2$ ), in test 2, Model A versus fix-Model A (lnL=-993.85),  $2\Delta l=8.770$ ,  $p\text{-value}=0.0031$  ( $df=1$ ).

260 All these two tests indicate that the Model A fits the data better than others, Model A suggests five  
261 sites to be potentially under positive selection along the foreground branch at the 95% level

262 according the BEB analysis, these sites are 1S, 43D, 130P, 138A, 152L, the parameters suggested  
263 by Model A are  $p_0=0.645$ ,  $p_1=0.153$ ,  $p_2=0.163$ ,  $p_3=0.0387$ ,  $\omega_0=0.00935$ ,  $\omega_2=999$ .

#### 264 *RCG6*

265 The three OBSM methods suggested an identical final optimal model. The estimating of Ka/Ks  
266 ratio except branch 5 is suggested to be infinite (999). Although it is failed in LRTs ( $df=1$   
267  $2\Delta L=3.108$   $p\text{-value}=0.0779$ ) when we nested a comparison between the final optimal model and  
268 fix-model which fixed the Ka/Ks ratio of all lineages equal to one except branch 5, the estimates of  
269 parameters in this optimal model suggest that they're about 19.5 non-synonymous substitutions  
270 versus 7.1 synonymous substitutions occurred along the branch 10, it has a great possibility that the  
271 lineage B is undergoing positive selection.

272 Based on the final optimal model, we used branch-site model to identify the positive sites. In test 1,  
273 M1a ( $\ln L=-511.42$ ) versus Model A ( $\ln L=-503.11$ ),  $2\Delta L=16.62$ ,  $p\text{-value}=2.461e-004$  ( $df=2$ ), in test  
274 2, Model A versus fix-Model A ( $\ln L=-508.34$ ),  $2\Delta L=10.46$ ,  $p\text{-value}=1.218e-003$  ( $df=1$ ). All these  
275 two tests indicate that the Model A fit the data better than others, Model A suggests three sites to be  
276 potentially under positive selection along the foreground branch at the 95% level according to BEB  
277 analysis, these sites are 6G, 7R, 8R, the parameters suggested by Model A are  $p_0=0.925$ ,  $p_1=0.00$ ,  
278  $p_2=0.0753$ ,  $p_3=0.00$ ,  $\omega_0=0.0045$ ,  $\omega_2=999$ .

#### 279 *RCG7*

280 Given the complexity of these eleven sequences included in this retrogene pair, the result of the  
281 most probable estimating models suggested by OBSM are all different. The final optimal model  
282 suggested by Method I is a six-ratio model and the  $\ln L$  value is -1058.33. The final optimal model  
283 suggested by Method II is a five-ratio model and the  $\ln L$  value is -1058.53. The final optimal model  
284 suggested by Method III is three-ratio model and the  $\ln L$  value is -1058.42. Although the final  
285 optimal model of the Method III has fewer parameters than other two models, the  $\ln L$  value of these  
286 three models are very close to each other. This final optimal model of Method III suggested the  
287 Ka/Ks ratios of all lineages are less than one while other two models all suggested the branch 18  
288 and lineage *Grandi\_P* are larger than one. Although all LRTs comparisons between the final  
289 optimal models of Method I and Method II and fix-model in which fix branch 18 and lineage  
290 *Grandi\_P* equal to one are failed, it is suggested by two final optimal models that the branch 18  
291 have a much higher substitution rate than the background substitution rate since the estimates of

292 parameters suggest that there're 7.6 non-synonymous substitutions versus 1.1 synonymous  
293 substitutions occurred along the branch 18.

294 We used the branch-site model to identify the positive sites, the suggested test 1 and the suggested  
295 test 2 are employed to detecting positive selection sites along branch 18. Test 1 suggested that  
296 Model A is significantly better than the model M1a while it is failed in test 2. Model A suggests five  
297 sites to be potentially under positive selection along the foreground branch at the 95% level  
298 according to the BEB analysis; these sites are 18L, 28G, 40G, 48S, 76V. The parameters suggested  
299 by Model A are  $p_0=0.788$ ,  $p_1=0.0612$ ,  $p_2=0.140$ ,  $p_3=0.0109$ ,  $\omega_0=0.0662$ ,  $\omega_2=12.81$ .

300 **Tajima' D test suggests the mutations in RCG4, RCG6 are deviation from neutral mutation**  
301 **hypothesis**

302 Whether retrogenes under neutral selection? We also employed Tajima' D test included in MEGA 7  
303 to check the mutations in chimerical retrogene (Tajima 1989). The result suggested only chimerical  
304 retrogene *RCG4* and *RCG6* pair are significant, while the mutations among the other four retrogene  
305 pairs are deviation from neutral. The significant deviation of D from 0 is observed in *RCG4* ( $p<0.01$ )  
306 and in *RCG6* ( $p<0.001$ ), the detail is shown in Table 3.

307 **The patterns of substitutions in new retrogenes and parental genes**

308 Three distinct patterns have been revealed base on synonymous and replacement sites in the seven  
309 gene pairs were shown in Fig. 2. (1) The chimerical genes were rapidly substituted in the initial  
310 stage of the new gene lineage under positive selection, e.g. *RCG2*. This is partially consistent with  
311 the pattern revealed by Jones and Begun (Jones and Begun 2005; Jones et al. 2005), three *Adh*  
312 related new retrogenes evolved rapidly after the new gene were formed. Furthermore, our result  
313 suggests the rapid evolution also happened to parental gene. This type of rerouted functional  
314 evolution covered several occasions: (2) The parental genes evolved rapidly soon after the  
315 chimerical genes were formed whereas the new genes evolved slowly in evolution. *RCG6* belongs  
316 to this category. (3) The parental genes evolved after some uncertain period of the chimerical genes  
317 were formed whereas the new genes evolved slowly in evolution, shown as *RCG3*, *RCG4*, *RCG5*  
318 and *RCG7*. Both pattern (2) and (3) implicated an unexpected process of evolution in functionality:  
319 the new retrogenes might replace the parental gene to carry out the ancestral functions while the  
320 parental gene might have evolved new functions driven in adaptive evolution.

321 ***RCG3* may plays an important role in disease resistance**

322 We compared our seven chimerical retrogenes to the probesets of Rice Genome Arrays of  
323 Affymetrix GeneChip, since the high complexity and the redundancy of the retro gene similar copy  
324 (Table 5) and the incomplete probesets coverage of rice genome, only pairs of *RCG3* and *RCG5*  
325 have the perfect match probesets, the compared detail is shown in Table 4, the expression profile  
326 can be got from the CERP database (<http://crep.ncpgr.cn/>). However, both *RCG3* and *RCG5* showed  
327 functional divergence (Fig. 3). Especially, according to the entire life cycle of rice gene  
328 expression data (Wang, et al. 2010), chimerical retrogene *RCG3* probe (Os.54355.1.S1\_at) has an  
329 expression peak in Zhenshan 97 (a variety of cultivated rice) at infection period in calli,  
330 germination period (72h after imbibition) in seed and 21 days after pollination in endosperm. This  
331 result is in consonance with the independent evidence from the TIGR  
332 (<http://rice.plantbiology.msu.edu>) that this gene encodes Leucine-rich proteins, and has a high  
333 similarity with the *Ve1* gene which has been shown to be resistant to *Verticillium wilt* disease  
334 (Fradin et al. 2009; Kawchuk et al. 2001).

### 335 **Chimerical retrogene *RCG1* is a young gene**

336 The Ks value for seven retrogenes was calculated based on the simple two sequences (parental  
337 verse new genes) comparison (Wang et al. 2006). The values were 0.124, 0.19, 0.281, 2.27, 0.547,  
338 1.884 and 3.575. Because more sequences data have been available, we recalculated the Ks value  
339 for *RCG1*, *RCG2* and *RCG3* by MEGA7 using the NG86 model (Nei and Gojobori 1986; Zhang, et  
340 al. 1998) with the transition/transversion ratio  $k=2$ . To estimate the divergence time accurately,  
341 since the branch *Austra* (Fig. 2) is ancestral to the clade generated by the retroposition event, this  
342 branch is excluded from *RCG1* data in the analysis. Then the Ks values with the 95% confidence  
343 interval for *RCG1*, *RCG2* and *RCG3* are  $0.041\pm 0.011$ ,  $0.090\pm 0.016$  and  $0.192\pm 0.021$  respectively.  
344 Assuming that the synonymous substitution rate of rice genes is  $6.5 \times 10^{-9}$  substitutions per site per  
345 year (Gaut, et al. 1996), then these chimerical retrogenes would have been formed around  
346  $3.15\pm 0.88$  MYA,  $6.92\pm 1.23$  MYA and  $14.77\pm 1.62$  MYA. These estimates suggest that the three  
347 chimerical retrogenes are very young (*RCG1* and *RCG2*) or young (*RCG3*).

### 348 **Discussion**

349 In this study, we used the program OBSM (Zhang et al. 2011) to explore the optimal branch model  
350 for chimerical genes. OBSM is CODEML (one program included in PAML package) (Yang 2007)  
351 aid programs which help the user to found out the optimal branch-specific models (Yang 1998)

352 using the maximum likelihood approach. We also used the branch-site approach to explore positive  
353 selection sites, although we note this method have some defects like it may not suggest right sites  
354 proposed by Nozawa, et al. (2009). In fact, in our data analysis, especially in *RCG3*, the sites  
355 suggested by MA model seem reasonable; because these sites are all belong to Leucine-rich repeat  
356 region which may have some connection with disease resistance. The disease resistance function  
357 may help the individual with better adaption to be selected to survive.

358 The common patterns and mechanisms shaping the evolution of new genes were generalized by  
359 many previous studies. Corbin D. Jones (Jones and Begun 2005; Jones et al. 2005) analyzed the  
360 origination of three *Drosophila* gene *jinwei*, *Adh-Finnegan*, and *Adh-Twain*, and unveiled three  
361 genes underwent rapid adaptive amino acid evolution in a short time after they were formed,  
362 followed by later quiescence and functional constraint. In 2008, study of novel alcohol  
363 dehydrogenase *siren1* and *siren2* also proved that chimerical genes evolved adaptively shortly after  
364 they were formed (Shih and Jones 2008). However, our results seem to indicate another different  
365 pattern, that is, besides the rapid adaptive amino acid evolution happened shortly after chimerical  
366 retrogene were formed, the rapid adaptive evolution also appeared in parental genes. This quickly  
367 evolution of parental gene occupied a high proportion in our seven chimerical retrogene pairs, six  
368 (*RCG2* to *RCG7*) of which have rapid adaptive evolution in parental gene evolution. The difference  
369 between *Drosophila* and *Oryza* may be caused by high proportion of retrotransposon in rice  
370 (McCarthy, et al. 2002; Baucom, et al. 2009; Paterson, et al. 2009), or because of the polyploidy  
371 origin of the rice genome and additional a recent segmental duplication occurred c. 5 MYA (Wang,  
372 et al. 2005). Subsequent large-scale chromosomal rearrangements and deletions may play an impact  
373 on the evolution pattern of chimerical retrogene pairs.

374 To compare the expression profile of *RCG3* and its parental gene, we locate the *RCG3* parental  
375 gene in *Japonica* genome and the located region is predicted as loci LocOs12g11370 by TIGR. The  
376 probeset (OsAffx.31701.1.S1\_at) in this region reveal that the parental gene has an expression peak  
377 at secondary-branch primordium differentiation stage (stage 3) at young panicle (Fig. 3), while its  
378 parental gene only showed negligible signal for this stage. This is reasonable because the high  
379 expression level at generative organ may capture a higher chance to retroposition among the  
380 genome sequences.

381 In our analysis, seven out of twenty-four (29.17%) chimerical retrogene pairs seem to be

382 undergoing positive selection. This proportion is much higher than that of previous whole-genome  
383 research in *Streptococcus* (Anisimova, et al. 2007) and *Apis mellifera* (Zayed and Whitfield 2008).  
384 The phylogenomic analysis of *Streptococcus* (Anisimova, et al. 2007) shows that 136 gene clusters  
385 out of 1730 (7.86%) underwent positive selection. Genome-wide analysis of positive selection in  
386 honey bee suggested that positive selection acted on a minimum of 852–1,371 genes or around 10%  
387 of the bee's coding genome (Zayed and Whitfield 2008). If we consider 10% coding genes of whole  
388 genome undertake positive selection as the average, then the proportion 29.17% of chimerical  
389 retrogene is significantly higher than the average in Fisher exact test ( $p=0.001$ ). We speculated that  
390 reverse transcribed mRNA intermediated new chimerical retrogene pairs have advantages for  
391 survival or propagation.

392

### 393 **Acknowledgments**

394 We thank Shiping Wang for valuable discussion and support. This research was financially  
395 supported by the National Natural Science Foundation of China (grant number 31571311), the CAS  
396 "Light of West China" Program (grant number 292017312D11022), and partly supported by the  
397 open funds of the National Key Laboratory of Crop Genetic Improvement (grant number  
398 ZK201605).



399

400

## References

- 401 Akaike H. 1974. A new look at the statistical model identification. *IEEE T Auto Cont* 19(6):716-723.
- 402 Anisimova M, Bielawski J, Dunn K, Yang Z. (Anisimova2007 co-authors). 2007. Phylogenomic analysis of  
403 natural selection pressure in Streptococcus genomes. *BMC Evol Biol* 7(1):154.
- 404 Baucom RS, Estill JC, Chaparro C, Upshaw N, Jogi A, Deragon J-M, Westerman RP, SanMiguel PJ, Bennetzen  
405 JL. 2009. Exceptional Diversity, Non-Random Distribution, and Rapid Evolution of Retroelements in the B73  
406 Maize Genome. *PLoS Genet* 5(11):e1000732.
- 407 Fradin EF, Zhang Z, Juarez Ayala JC, Castroverde CDM, Nazar RN, Robb J, Liu C-M, Thomma BPHJ. 2009.  
408 Genetic Dissection of *Verticillium* Wilt Resistance Mediated by Tomato Ve1. *Plant Physiol* 150(1):320-332.
- 409 Gaut BS, Morton BR, McCaig BC, Clegg MT. 1996. Substitution rate comparisons between grasses and palms:  
410 synonymous rate differences at the nuclear gene *Adh* parallel rate differences at the plastid gene *rbcL*. *Proc Natl  
411 Acad Sci* 93(19):10274-10279.
- 412 Jones CD, Begun DJ. 2005. Parallel evolution of chimeric fusion genes. *Proc Natl Acad Sci*  
413 102(32):11373-11378.
- 414 Jones CD, Custer AW, Begun DJ. 2005. Origin and Evolution of a Chimeric Fusion Gene in *Drosophila*  
415 *subobscura*, *D. madeirensis* and *D. guanche*. *Genetics* 170(1):207-219.
- 416 Kaessmann H, Vinckenbosch N, Long M. 2009. RNA-based gene duplication: mechanistic and evolutionary  
417 insights. *Nat Rev Genet* 10(1):19-31.
- 418 Kawchuk LM, Hachey J, Lynch DR, Kulcsar F, van Rooijen G, Waterer DR, Robertson A, Kokko E, Byers R,  
419 Howard RJ, et al. 2001. Tomato *Ve* disease resistance genes encode cell surface-like receptors. *Proc Natl Acad  
420 Sci* 98(11):6511-6515.
- 421 Long M, Langley C. 1993. Natural selection and the origin of jingwei, a chimeric processed functional gene in  
422 *Drosophila*. *Science* 260(5104):91-95.
- 423 Marques AC, Dupanloup I, Vinckenbosch N, Reymond A, Kaessmann H. 2005. Emergence of Young Human  
424 Genes after a Burst of Retroposition in Primates. *PLoS Biol* 3(11):e357.
- 425 McCarthy EM, Liu J, Lizhi G, McDonald JF. (McCarthy2002 co-authors). 2002. Long terminal repeat  
426 retrotransposons of *Oryza sativa*. *Genome Biology* 3(10):research0053.0051.
- 427 Nei M, Gojobori T. 1986. Simple methods for estimating the numbers of synonymous and nonsynonymous  
428 nucleotide substitutions. *Mol Biol Evol* 3(5):418-426.
- 429 Nozawa M, Aotsuka T, Tamura K. 2005. A Novel Chimeric Gene, *siren*, With Retroposed Promoter Sequence  
430 in the *Drosophila bipunctata* Complex. *Genetics* 171(4):1719-1727.
- 431 Nozawa M, Suzuki Y, Nei M. 2009. Reliabilities of identifying positive selection by the branch-site and the  
432 site-prediction methods. *Proc Natl Acad Sci* 106(16):6700-6705.
- 433 Nurminsky DI, Nurminskaya MV, Aguiar DD, Hartl DL. 1998. Selective sweep of a newly evolved  
434 sperm-specific gene in *Drosophila*. *Nature* 396(6711):572-575.
- 435 Paterson AH, Bowers JE, Bruggmann R, Dubchak I, Grimwood J, Gundlach H, Haberer G, Hellsten U, Mitros  
436 T, Poliakov A, et al. 2009. The Sorghum bicolor genome and the diversification of grasses. *Nature*  
437 457(7229):551-556.
- 438 Rogers RL, Bedford T, Hartl DL. 2009. Formation and Longevity of Chimeric and Duplicate Genes in  
439 *Drosophila melanogaster*. *Genetics* 181(1):313-322.
- 440 Rogers RL, Bedford T, Lyons AM, Hartl DL. 2010. Adaptive impact of the chimeric gene *Quetzalcoatl* in  
441 *Drosophila melanogaster*. *Proc Natl Acad Sci* 107(24):10943-10948.
- 442 Shih H-J, Jones CD. 2008. Patterns of Amino Acid Evolution in the *Drosophila ananassae* Chimeric Gene,  
443 *siren*, Parallel Those of Other *Adh*-Derived Chimeras. *Genetics* 180(2):1261-1263.
- 444 Tajima F. 1989. Statistical method for testing the neutral mutation hypothesis by DNA polymorphism. *Genetics*  
445 123(3):585-595.
- 446 Tamura K, Dudley J, Nei M, Kumar S. 2007. MEGA4: Molecular Evolutionary Genetics Analysis (MEGA)  
447 Software Version 4.0. *Mol Biol Evol* 24(8):1596-1599.
- 448 Virgen CA, Kratovac Z, Bieniasz PD, Hatzioannou T. 2008. Independent genesis of chimeric  
449 TRIM5-cyclophilin proteins in two primate species. *Proc Natl Acad Sci* 105(9):3563-3568.
- 450 Wang L, Xie W, Chen Y, Tang W, Yang J, Ye R, Liu L, Lin Y, Xu C, Xiao J, et al. 2010. A dynamic gene  
451 expression atlas covering the entire life cycle of rice. *The Plant Journal* 61(5):752-766.
- 452 Wang W, Brunet FG, Nevo E, Long M. 2002. Origin of *sphinx*, a young chimeric RNA gene in *Drosophila*  
453 *melanogaster*. *Proc Natl Acad Sci* 99(7):4448-4453.
- 454 Wang W, Yu H, Long M. 2004. Duplication-degeneration as a mechanism of gene fission and the origin of new  
455 genes in *Drosophila* species. *Nat Genet* 36(5):523.
- 456 Wang W, Zheng H, Fan C, Li J, Shi J, Cai Z, Zhang G, Liu D, Zhang J, Vang S, et al. 2006. High Rate of  
457 Chimeric Gene Origination by Retroposition in Plant Genomes. *The Plant Cell* 18(8):1791-1802.
- 458 Wang X, Shi X, Hao B, Ge S, Luo J. 2005. Duplication and DNA segmental loss in the rice genome:

- 459 implications for diploidization. *New Phytol* 165(3):937-946.
- 460 Wilson SJ, Webb BLJ, Ylinen LMJ, Verschoor E, Heeney JL, Towers GJ. 2008. Independent evolution of an  
461 antiviral TRIMCyp in rhesus macaques. *Proc Natl Acad Sci* 105(9):3557-3562.
- 462 Yang Z. 1998. Likelihood ratio tests for detecting positive selection and application to primate lysozyme  
463 evolution. *Mol Biol Evol* 15(5):568-573.
- 464 Yang Z. 2007. PAML 4: Phylogenetic Analysis by Maximum Likelihood. *Mol Biol Evol* 24(8):1586-1591.
- 465 Yang Z, Nielsen R. 2002. Codon-Substitution Models for Detecting Molecular Adaptation at Individual Sites  
466 Along Specific Lineages. *Mol Biol Evol* 19(6):908-917.
- 467 Zayed A, Whitfield CW. 2008. A genome-wide signature of positive selection in ancient and recent invasive  
468 expansions of the honey bee *Apis mellifera*. *Proc Natl Acad Sci* 105(9):3421-3426.
- 469 Zhang C, Wang J, Xie W, Zhou G, Long M, Zhang Q. 2011. Dynamic programming procedure for searching  
470 optimal models to estimate substitution rates based on the maximum-likelihood method. *Proc Natl Acad*  
471 *Sci*:201018621.
- 472 Zhang J, Dean AM, Brunet F, Long M. 2004. Evolving protein functional diversity in new genes of *Drosophila*.  
473 *Proc Natl Acad Sci* 101(46):16246-16250.
- 474 Zhang J, Nielsen R, Yang Z. 2005. Evaluation of an Improved Branch-Site Likelihood Method for Detecting  
475 Positive Selection at the Molecular Level. *Mol Biol Evol* 22(12):2472-2479.
- 476 Zhang J, Rosenberg HF, Nei M. 1998. Positive Darwinian selection after gene duplication in primate  
477 ribonuclease genes. *Proc Natl Acad Sci* 95(7):3708-3713.
- 478 Zhang Y, Wu Y, Liu Y, Han B. 2005. Computational Identification of 69 Retroposons in Arabidopsis. *Plant*  
479 *Physiol* 138(2):935-948.
- 480
- 481



## Figure captions

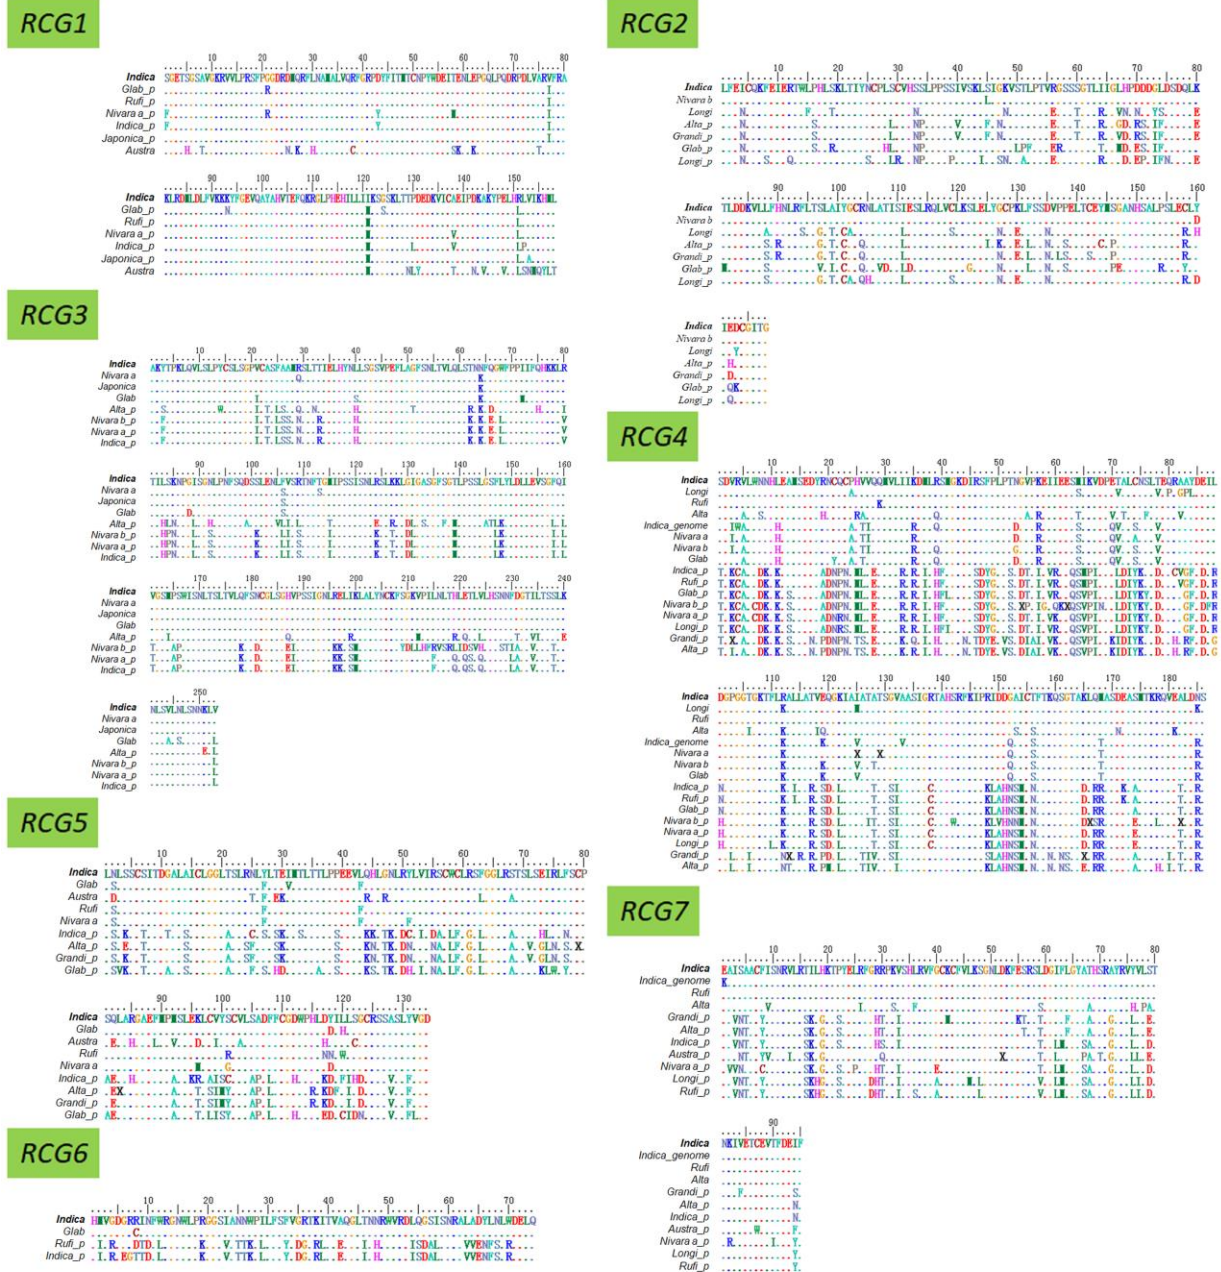

Figure 1. The amino acid alignment of seven chimerical retrogene pairs. *\_p* represented the sequence of parental gene; *\_genome* means the corresponding genomic region of Indica (9311) were used as substitutions of RCGs if it successfully amplified by PCR in sibling species but failed in 9311 or is differed from 9311 PCR results. Dot signify the amino acid was the same with that of 9311 in the alignment. The names of species are consistent with the short name of Table S1.

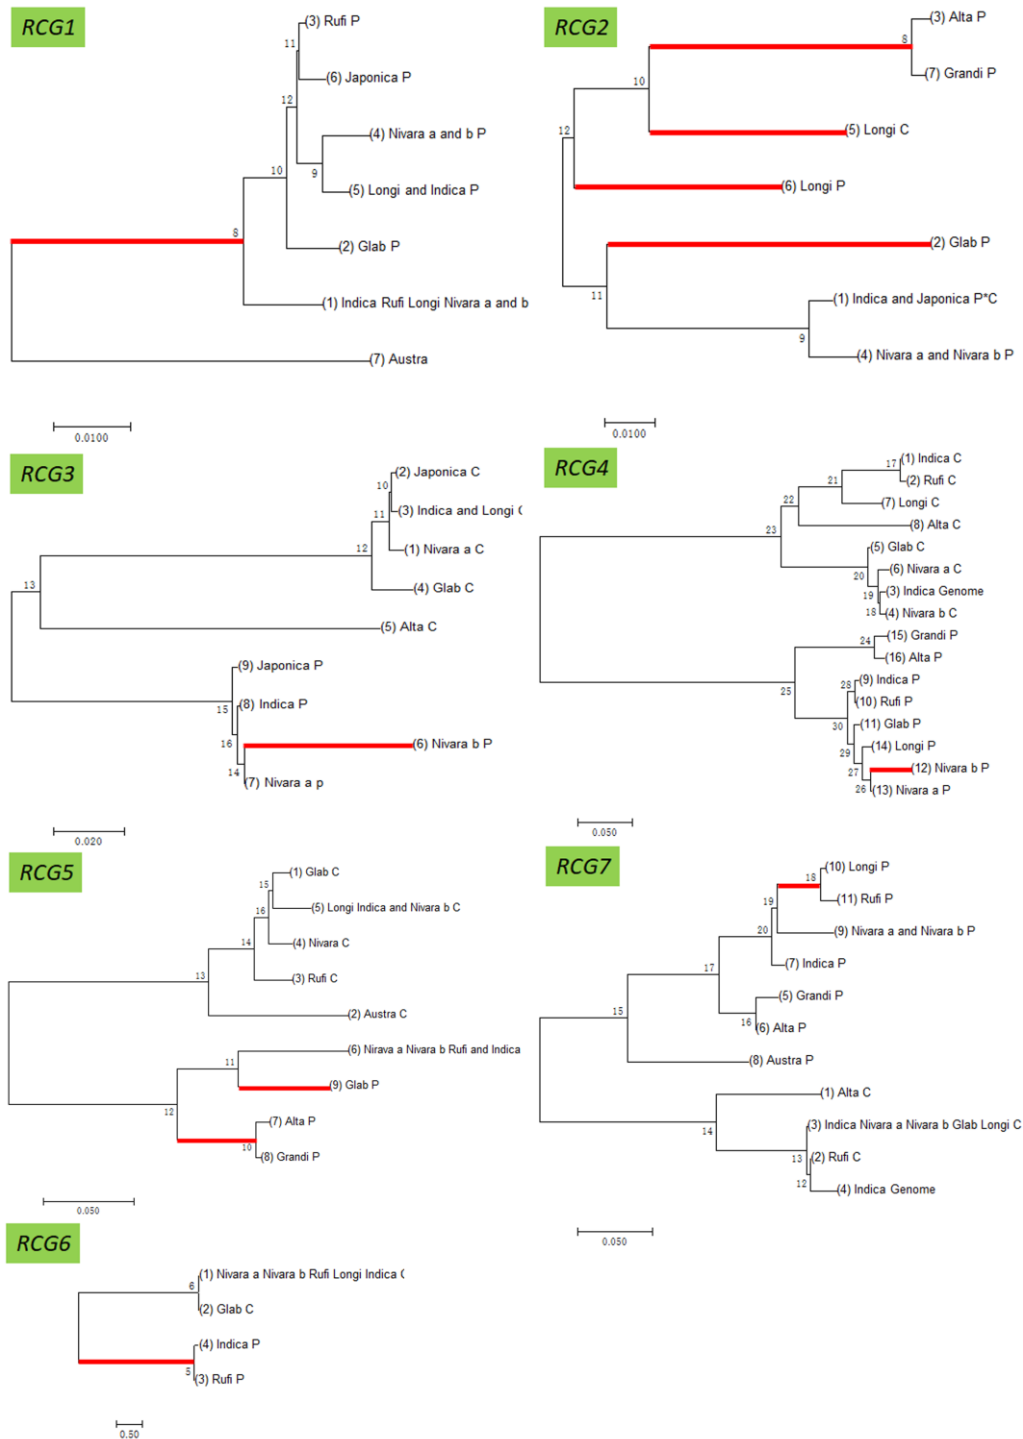

Figure 2. The phylogeny of seven chimerical retrogenes pairs. Phylogenetic tree was built in MEGA7 with default parameters. *\_p* represented the sequence of parental gene and C means the chimerical retrogene; Genome suffixed in the specie name means the corresponding genomic region of Indica (9311) were used as substitutions of RCGs if it successfully amplified by PCR in sibling species but failed in 9311. Positive selection happened on the red bold branch. The species names are consistent with the shorted specie names of Table S1, & in the specie name represent the concatenated species share the identical sequence. The same for Fig. S2.



## Table legend

Table 1 Log likelihood value of seven chimerical retrogene pairs.

|                                    | OBSM method | ORM<br>(lnL value)      | Final<br>Optimal model  | Free-Model              |
|------------------------------------|-------------|-------------------------|-------------------------|-------------------------|
| <i>AK070196</i><br>( <i>RCG1</i> ) | Method I    | -1001.441743<br>(np=14) | -999.367951             | -995.133891<br>(np=25)  |
|                                    | Method II   |                         | (np=15)                 |                         |
|                                    | Method III  |                         | -996.78059<br>(np=15)   |                         |
| <i>AK106715</i><br>( <i>RCG2</i> ) | Method I    | -1385.374644<br>(np=14) | -1381.523869            | -1377.501566<br>(np=25) |
|                                    | Method II   |                         | (np=15)                 |                         |
|                                    | Method III  |                         | -1380.484048<br>(np=15) |                         |
| <i>AK072107</i><br>( <i>RCG3</i> ) | Method I    | -2108.544224<br>(np=18) | -2105.905565            | -2101.002768<br>(np=33) |
|                                    | Method II   |                         | (np=19)                 |                         |
|                                    | Method III  |                         | -2104.405182<br>(np=19) |                         |
| <i>AK102855</i><br>( <i>RCG4</i> ) | Method I    | -2638.742070<br>(np=32) | -2595.790736<br>(np=38) | -2580.376384<br>(np=61) |
|                                    | Method II   |                         | -2587.666653<br>(np=37) |                         |
|                                    | Method III  |                         | -2586.485566<br>(np=34) |                         |
| <i>AK105722</i><br>( <i>RCG5</i> ) | Method I    | -1525.257954<br>(np=18) | -1523.006910            | -1517.473148<br>(np=33) |
|                                    | Method II   |                         | (np=19)                 |                         |
|                                    | Method III  |                         | -1520.804793<br>(np=19) |                         |
| <i>AK107097</i><br>( <i>RCG6</i> ) | Method I    | -519.622517<br>(np=8)   | -508.323754             | -508.196430<br>(np=13)  |
|                                    | Method II   |                         | (np=9)                  |                         |
|                                    | Method III  |                         |                         |                         |
| <i>AK064639</i><br>( <i>RCG7</i> ) | Method I    | -1086.356427<br>(np=22) | -1058.334507<br>(np=27) | -1054.066396<br>(np=41) |
|                                    | Method II   |                         | -1058.527587<br>(np=26) |                         |
|                                    | Method III  |                         | -1058.418009<br>(np=24) |                         |

ORM, one ratio model; OBSM, optimal branch- specific model.

Table 2 Branch-site method estimation of seven chimerical retrogene pairs. MA, model A of branch-site model analysis in PAML.

|             | MA       | Fixed_MA | M1a      | Test 1 df=2<br>(MA vs<br>M1a) | Test 2 df=1<br>(MA vs<br>Fix_MA) | $\omega$ ratio                             | Parameter<br>estimates                                          | Positively selected sites                                                                                                                                                                                                               |
|-------------|----------|----------|----------|-------------------------------|----------------------------------|--------------------------------------------|-----------------------------------------------------------------|-----------------------------------------------------------------------------------------------------------------------------------------------------------------------------------------------------------------------------------------|
| <i>RCG1</i> | -989.46  | -993.85  | -995.55  | 0.0023                        | 0.0031                           | $\omega_0=0.009,$<br>$\omega_2= 999$       | $p_0= 0.645,$<br>$p_1= 0.153,$<br>$p_2=0.163,$<br>$p_3=0.039$   | 1S, 43D, 130P, 138A, 152L                                                                                                                                                                                                               |
| <i>RCG2</i> | -1370.10 | -1379.50 | -1382.71 | 3.327e-006                    | 1.453e-005                       | $\omega_0= 0,$<br>$\omega_2= 3.485$        | $p_0= 0.364,$<br>$p_1= 0.123,$<br>$p_2= 0.384,$<br>$p_3= 0.129$ | 19S, 29L, 56E, 67G, 68D, 71S, 73I, 74F,<br>88S, 97G, 127K, 158R, 160Y, 163D                                                                                                                                                             |
| <i>RCG3</i> | -2055.13 | -2091.04 | -2092.78 | P<0.001                       | P<0.001                          | $\omega_0= 0,$<br>$\omega_2=$<br>669.88    | $p_0= 0.461,$<br>$p_1= 0.467,$<br>$p_2= 0.036,$<br>$p_3= 0.036$ | 210G, 211K, 215L, 216N, 218T, 220L, 221E,<br>228N, 229N, 230F                                                                                                                                                                           |
| <i>RCG4</i> | -2562.20 | -2563.72 | -2608.32 | P<0.001                       | 0.0819                           | $\omega_0=$<br>0.023,<br>$\omega_2= 1.801$ | $p_0= 0.249,$<br>$p_1= 0.084,$<br>$p_2= 0.499,$<br>$p_3= 0.168$ | 3R, 6W, 12A, 26V, 28Q, 40M, 50P, 52N,<br>54P, 56E, 57I, 58I, 59E, 62I, 65D, 77Q, 78R,<br>79A, 81Y, 84I, 100P, 107F, 110L, 111L,<br>116Q, 121A, 122T, 123A, 125G, 127A,<br>136S, 142R, 144D, 153K, 155S, 156G, 159Q,<br>164E, 170R, 172V |

---

|             |          |          |          |            |            |                                                |                                                                 |                         |
|-------------|----------|----------|----------|------------|------------|------------------------------------------------|-----------------------------------------------------------------|-------------------------|
| <i>RCG5</i> | -1491.98 | -1497.84 | -1497.98 | 6.182e-004 | 2.462e-003 | $\omega_0=$<br>0.120,<br>$\omega_2=$<br>16.916 | $p_0= 0.602,$<br>$p_1= 0.290,$<br>$p_2= 0.073,$<br>$p_3= 0.035$ | 51Y, 75R                |
| <i>RCG6</i> | -503.11  | -508.34  | -511.42  | 2.461e-004 | 1.218e-003 | $\omega_0=$<br>0.004,<br>$\omega_2= 999$       | $p_0= 0.925,$<br>$p_1= 0.000,$<br>$p_2= 0.075,$<br>$p_3= 0.000$ | 6G, 7R,8R               |
| <i>RCG7</i> | -1072.84 | -1073.88 | -1077.28 | 0.012      | 0.149      | $\omega_0=$<br>0.066,<br>$\omega_2=$<br>12.808 | $p_0= 0.788,$<br>$p_1= 0.061,$<br>$p_2= 0.140,$<br>$p_3= 0.01$  | 18L, 28G, 40G, 48S, 76V |

---

Table 3 Results of Tajima's Neutrality Test for seven chimerical retrogene pairs.

|             | m  | S   | $p_s$ | $\Theta$ | $\pi$ | D     |
|-------------|----|-----|-------|----------|-------|-------|
| <i>RCG4</i> | 16 | 313 | 0.570 | 0.172    | 0.270 | 2.486 |
| <i>RCG6</i> | 4  | 79  | 0.357 | 0.195    | 0.240 | 2.443 |

The Tajima test statistic was estimated using MEGA7. All positions containing gaps and missing data were eliminated from the dataset (Complete deletion option). The abbreviations used are as follows: m = number of sites, S = Number of segregating sites,  $p_s = S/m$ ,  $\Theta = p_s/a1$ , and  $\pi$  = nucleotide diversity. D is the Tajima test statistic.

Table 4 Affymetrix GeneChip expression profile of seven chimerical retrogene pairs.

|             | Chimerical retrogene ID in Plant cell paper         | Chimerical Affy Probset names | Parental Affy Probset names |
|-------------|-----------------------------------------------------|-------------------------------|-----------------------------|
| <i>RCG1</i> | Chr03_4107, AK070196_Chr03_27608263_27613159        | NA                            | NA                          |
| <i>RCG2</i> | Chr04_4524, updata_AK106715_Chr04_30664045_30669070 | Os.57563.1.S1_at              | NA                          |
| <i>RCG3</i> | Chr12_904, updata_AK072107_Chr12_5820378_5826726    | Os.54355.1.S1_at              | OsAffx.31701.1.S1_at        |
| <i>RCG4</i> | Chr10_2602, updata_AK102855_Chr10_17747411_17752061 | NA                            | OsAffx.29724.1.S1_at        |
| <i>RCG5</i> | Chr01_5436, updata_AK105722_Chr01_36521616_36526443 | Os.35231.1.S1_at              | Os.50239.1.S1_a_at          |
| <i>RCG6</i> | Chr02_1920, updata_AK107097_Chr02_12785386_12789823 | NA                            | Os.54261.S1_at              |
| <i>RCG7</i> | Chr08_3454, updata_AK064639_Chr08_24470676_24475311 | NA                            | NA                          |

Sequences of chimerical gene and its parental gene were searched against rice expression profile CREP (<http://crep.ncpgr.cn/crep-cgi/home.pl>). Probe applied to target sequence only when no mismatch (e-value=0) and hybrid to the right position. NA, no perfect match was found for chimerical retrogene pairs.



Table 5 Copy number variation of similarity hits in OMAP/OGE genomes.

|                              | RCG1 | RCG2 | RCG3  | RCG4 | RCG5 | RCG6 | RCG7 | Genome_size (Mb) |
|------------------------------|------|------|-------|------|------|------|------|------------------|
| <i>Oryza barthii</i>         | 118  | 106  | 12000 | 59   | 104  | 39   | 794  | 760              |
| <i>Oryza brachyantha</i>     | 10   | 55   | 6667  | 47   | 28   | 4    | 729  | 389              |
| <i>Oryza glaberrima</i>      | 131  | 102  | 11609 | 60   | 90   | 30   | 1240 | 389              |
| <i>Oryza longistaminata</i>  | 89   | 214  | 806   | 129  | 95   | 48   | 217  | 760              |
| <i>Oryza meridionalis</i>    | 161  | 36   | 11201 | 70   | 80   | 34   | 298  | 760              |
| <i>Oryza nivara</i>          | 136  | 54   | 12000 | 81   | 90   | 36   | 821  | 539              |
| <i>Oryza punctata</i>        | 1148 | 38   | 9116  | 96   | 58   | 13   | 1776 | 1691             |
| <i>Oryza rufipogon</i>       | 160  | 79   | 12000 | 120  | 122  | 37   | 1315 | 1201             |
| <i>Oryza sativa indica</i>   | 146  | 84   | 12107 | 155  | 124  | 29   | 1382 | 1000             |
| <i>Oryza sativa japonica</i> | 142  | 67   | 12037 | 158  | 125  | 35   | 1678 | 1054             |

The genomic sequences of seven RCGs were blastn searched against Gramene database with the e-value threshold of 1e-5.

## Supporting Information

Fig. S1 The amino acid alignment of seventeen chimerical retrogene pairs.

Fig. S2 The phylogeny of seventeen chimerical retrogene pairs.

Fig. S3 Paradigm of the chimerical retrogene model. Colorful rectangular boxes represent the exons, greyish boxes represent introns. Superordinate gene in each model is parental gene, lower part in each model is chimerical retrogene. Solid lines mean the border of homologous block and numbers designate the relative position.

Table S1 Species used in our analysis.

Table S2 Primers for PCR and sequencing.

Table S3 Chimerical retrogene and parental gene in IR8. The sequence of chimerical retrogene and corresponding parental gene were blat searched against *Indica* rice genome IR8, which was sequenced by Pacbio technology. Round brackets indicated the output of blat; angle brackets mean when blat out were too long, the sequences range were narrowed down by gene-specific primer.

Table S4 PCR based sequencing statistics of retrogenes and parental genes. C: Means the retro-chimerical gene; P: Means the parental gene; x: Means did not get PCR result; na: Means did not get valuable sequence; \*: using the *Indica* reference sequence; &: The cloned sequence did not perfect match the reference sequence of 9311. Total sequences numbers, means the number of sequence type used for phylogeny construction, which correspond to the maximum value in C and P column for each retrogene.

The different number in the two columns of each retrogene represent a sequence type that unique for one or several species, which consistent with the sequence number of phylogenies in Fig.2.

Table S5. The lnL value comparison and the most probable model suggestion. Model fitting was optimized in OBSM (Zhang et al., 2011). \*, significant at  $p < 0.05$ ; \*\*, significant at  $p < 0.01$ .
